# Supplementary material
Source: ML conference proceedings conference paper supplement (https://openreview.net/forum?id=z4g0Vpf5Zki)

# steps  
to goal  
(30 runs)

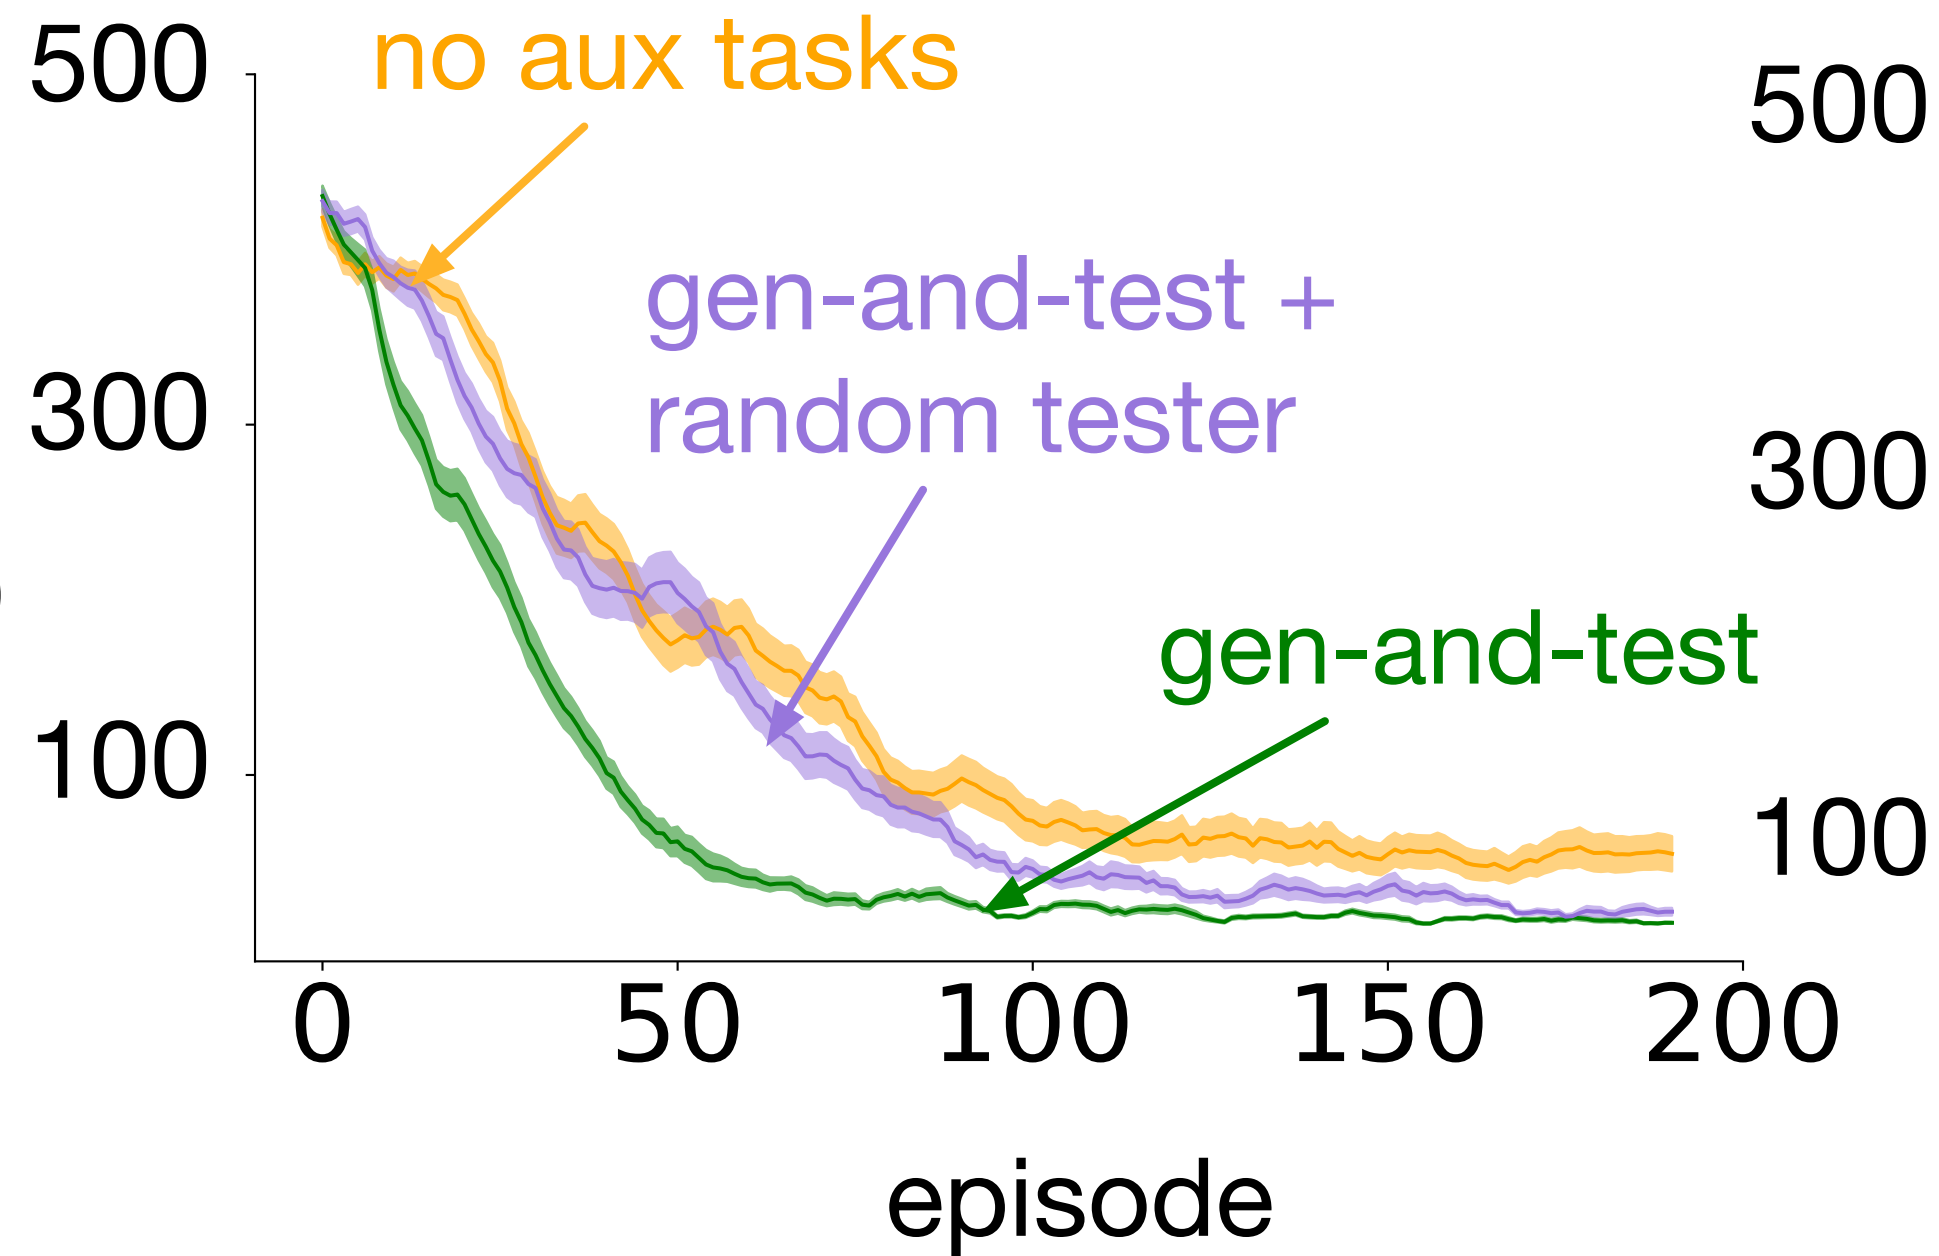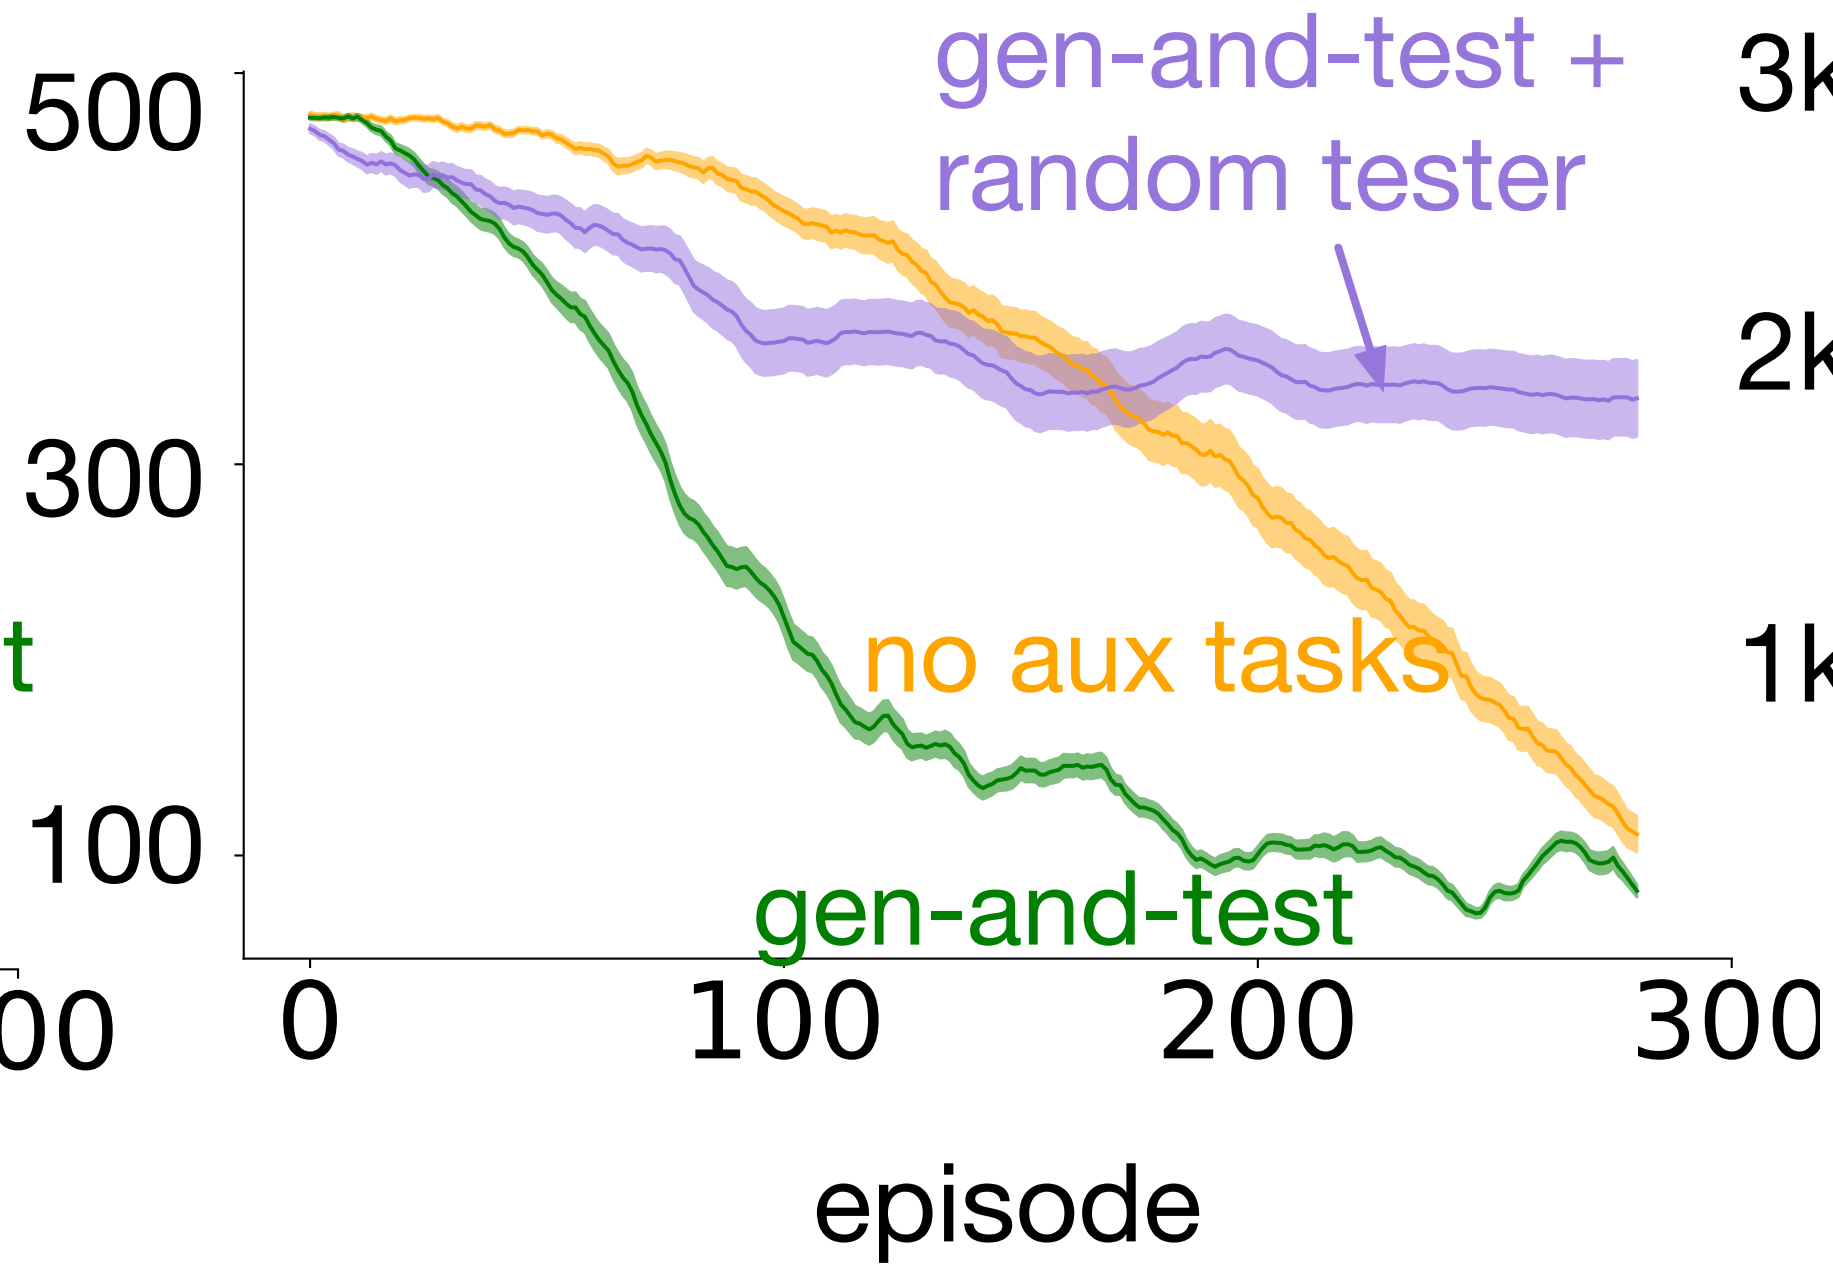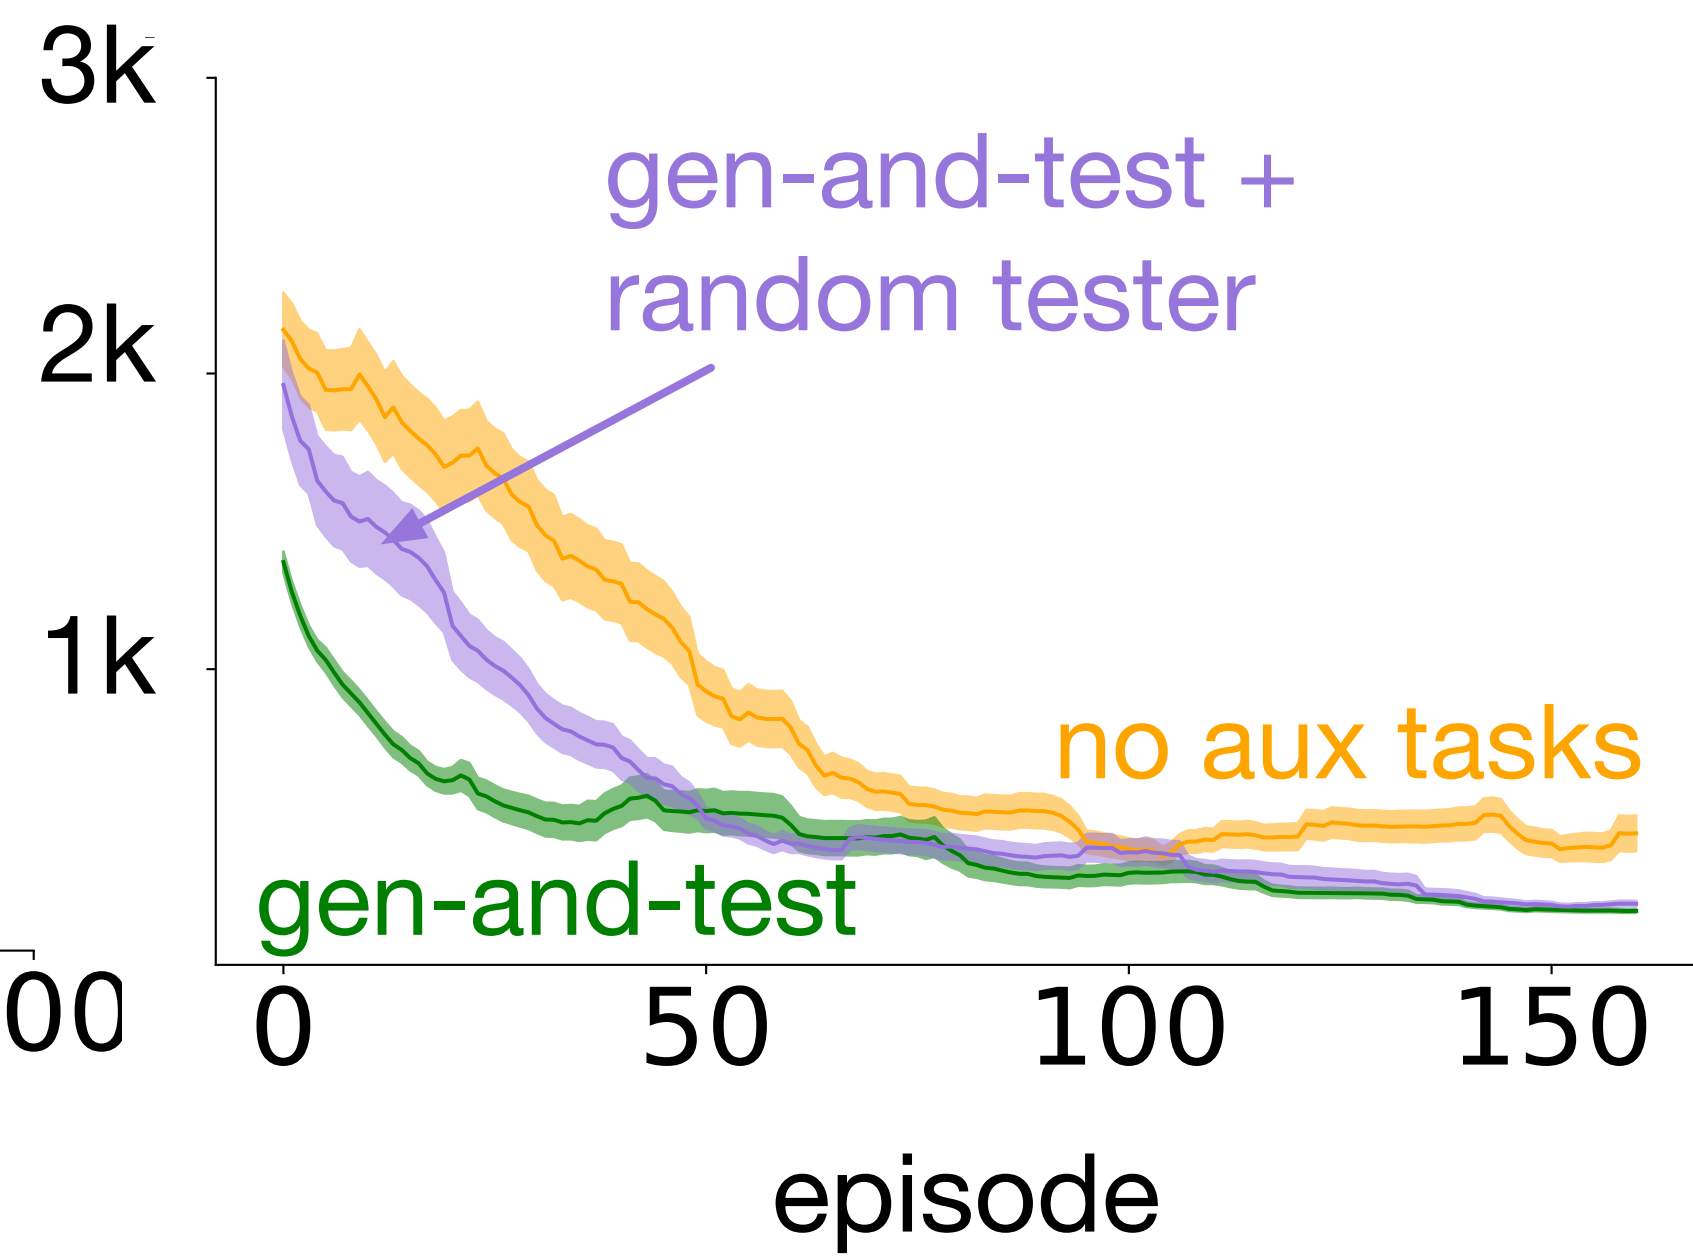

Supplement: supplementary_material [file attachment]
